# Supplementary material for: Diversified Farming in a Monoculture Landscape: Effects on Honey Bee Health and Wild Bee Communities
Source: PubMed Central journal article supplement — Environ Entomol. 2020 Apr 4;49(3):753–64. doi: 10.1093/ee/nvaa031 (PMC7371362; doi:10.1093/ee/nvaa031), 2020-04-04
Supplement: nvaa031_suppl_supplementary_figures_and_tables.pdf [file nvaa031_suppl_supplementary_figures_and_tables.pdf]

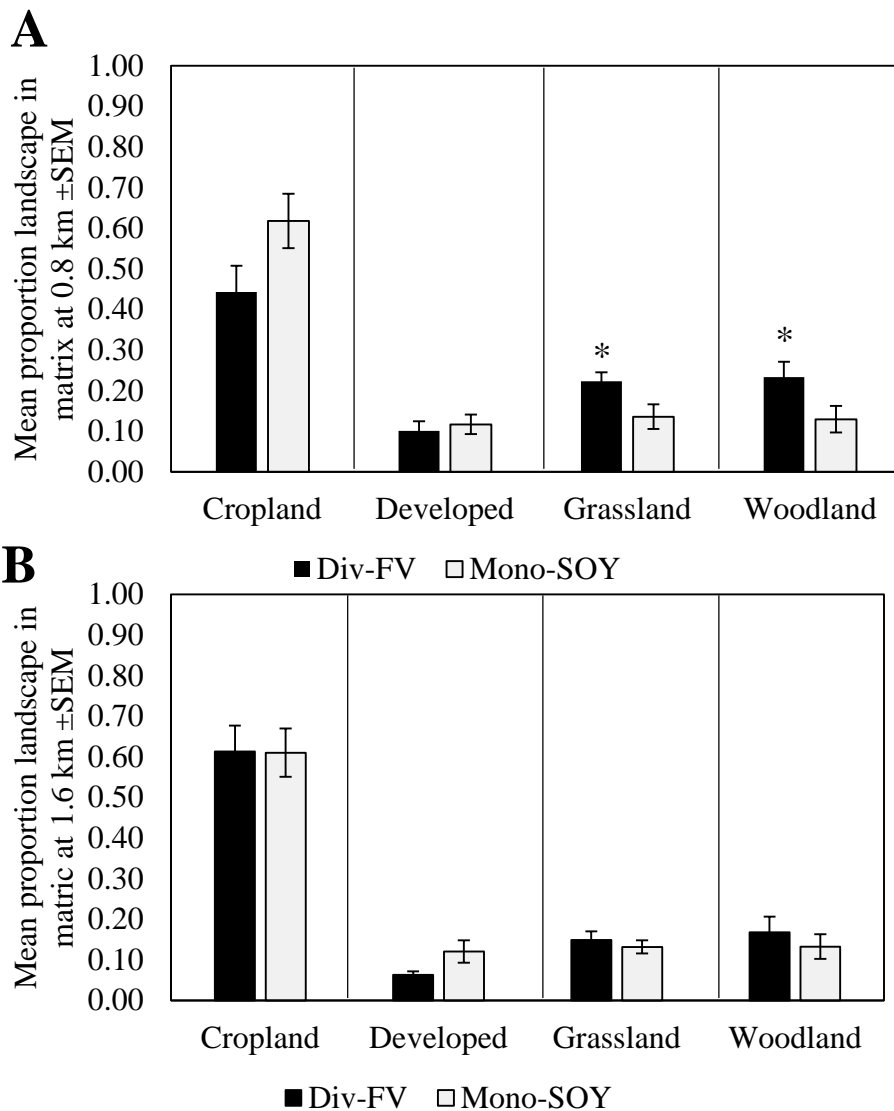

**Figure S1.** (A) Mean proportion of each landscape category found within a 0.8 km radius of colonies in Div-FV (black) and Mono-SOY (grey) farms in central Iowa over 2015 and 2016. Two tailed t-tests of each landscape category showed no difference in proportion cropland ( $T_{23,218} = 1.88$ ;  $P=0.07$ ) or developed land ( $T_{23,10}=0.47$ ;  $P=0.64$ ) surrounding farms. However, there were significantly greater proportions of grassland ( $T_{26,50}=2.31$ ;  $P=0.03$ ) and woodland ( $T_{19,80}=2.08$ ;  $P=0.05$ ) surrounding Div-FV farms compared to Mono-SOY farms. (B) Mean proportion of each landscape category found within a 1.6 km radius of colonies in Div-FV (black) and Mono-SOY (grey) farms in central Iowa over 2015 and 2016. Data represent 4 Div-FV and 10 Mono-SOY farms in 2015 and 5 Div-FV and 10 Mono-SOY farms in 2016. Two tailed t-tests of each landscape category showed no difference in proportion cropland ( $T_{18,17}=0.04$ ;  $P=0.97$ ), developed ( $T_{22,61}=1.97$ ;  $P=0.07$ ), grassland ( $T_{18,17}=0.65$ ;  $P=0.52$ ), or woodland ( $T_{18,132}=0.72$ ;  $P=0.48$ ) between Div-FV and Mono-SOY farms.

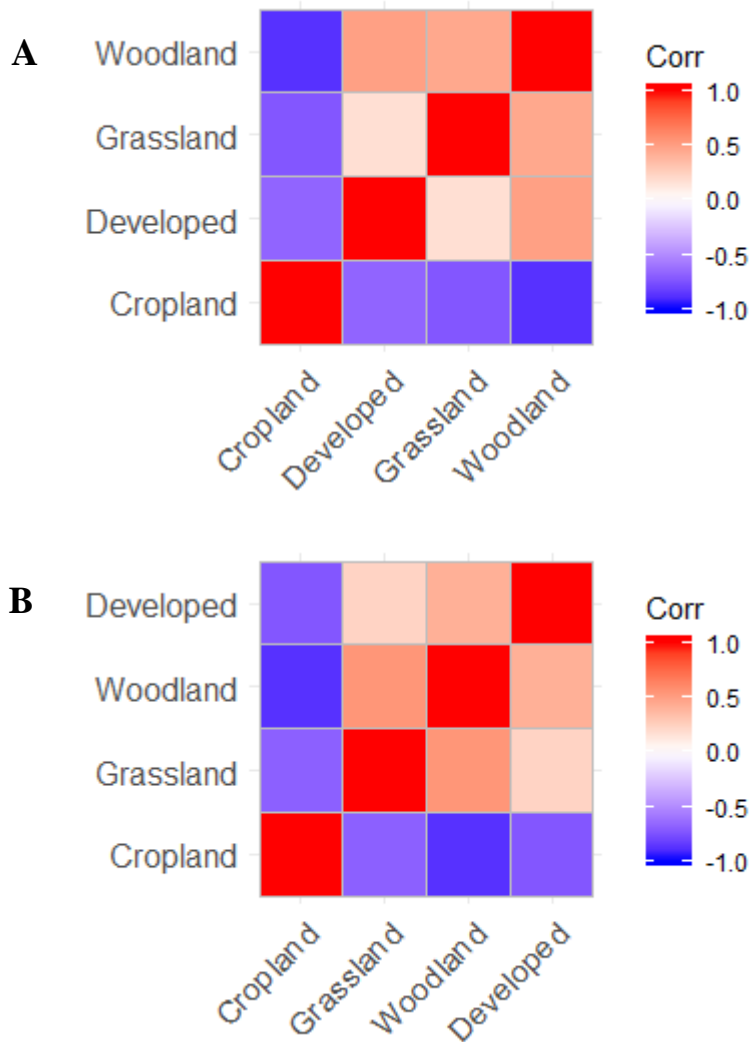

**Figure S2.** Correlation plots for land cover features surrounding Mono-SOY and Div-FV farms in 2015 and 2016 at **(A)** 0.8 km and **(B)** 1.6 km radius.

**Table S1.** Farms selected for bee community sampling in central Iowa during 2015 and 2016.

| <b>Site</b> | <b>Farm Type</b> | <b>Year</b> | <b>County</b> |
|-------------|------------------|-------------|---------------|
| JUL         | Mono-Soy         | 2015        | Boone         |
| LIP         | Mono-Soy         | 2015        | Boone         |
| CAT         | Mono-Soy         | 2015        | Boone         |
| WDAR        | Mono-Soy         | 2015        | Story         |
| CUR         | Mono-Soy         | 2015        | Story         |
| HOR         | Mono-Soy         | 2015        | Story         |
| OFAM        | Mono-Soy         | 2015        | Hardin        |
| GLI         | Mono-Soy         | 2015        | Hardin        |
| IR          | Mono-Soy         | 2015        | Hardin        |
| LP          | Mono-Soy         | 2015        | Hardin        |
| IVI         | Mono-Soy         | 2016        | Boone         |
| KOS         | Mono-Soy         | 2016        | Boone         |
| TRA1        | Mono-Soy         | 2016        | Boone         |
| TRA3        | Mono-Soy         | 2016        | Boone         |
| CUR         | Mono-Soy         | 2016        | Story         |
| EASD        | Mono-Soy         | 2016        | Story         |
| HAG1        | Mono-Soy         | 2016        | Story         |
| OAK         | Mono-Soy         | 2016        | Story         |
| ONT         | Mono-Soy         | 2016        | Story         |
| UTH         | Mono-Soy         | 2016        | Story         |
| SEV         | Div-FV           | 2015, 2016  | Story         |
| RIV         | Div-FV           | 2015, 2016  | Polk          |
| MUS         | Div-FV           | 2016        | Story         |
| BER         | Div-FV           | 2016        | Polk          |
| BLA         | Div-FV           | 2016        | Polk          |
| NFAM        | Div-FV           | 2016        | Polk          |
| MESK        | Div-FV           | 2016        | Tama          |

**Table S2.** Div-FV (diverse fruit and vegetable) farm land area and number of crops in production in 2015 and 2016.

| <b>Farm</b> | <b>Sampling Year</b> | <b>Hectares</b> | <b>Number of crops</b> | <b>Pesticide Regime</b> |
|-------------|----------------------|-----------------|------------------------|-------------------------|
| NFAM        | 2015                 | 2.0             | 30                     | Conventional            |
| MESK        | 2015                 | 2.8             | 15                     | Conventional            |
| SEV         | 2015, 2016           | 1.8             | 36                     | Certified Organic       |
| RIV         | 2015, 2016           | 4.8             | 31                     | Conventional            |
| MUS         | 2016                 | 1.2             | 35                     | Conventional            |
| BER         | 2016                 | 16.2            | 12                     | Conventional            |
| BLA         | 2016                 | 14.6            | 50                     | Certified Organic       |

**Table S3.** Number of bees collected in pan traps in each taxa over the two years of the study in each farm type.

| Family         | Genus                 | Species               | 2015   |          | 2016   |          |
|----------------|-----------------------|-----------------------|--------|----------|--------|----------|
|                |                       |                       | Div-FV | Mono-SOY | Div-FV | Mono-SOY |
| Andrenidae     | <i>Calliopsis</i>     | <i>andreniformis</i>  | 0      | 1        | 0      | 2        |
|                | <i>Perdita</i>        | <i>boltoniae</i>      | 1      | 0        | 0      | 0        |
|                | <i>Perdita</i>        | <i>halictoides</i>    | 1      | 1        | 0      | 0        |
|                | <i>Protandrena</i>    | <i>bancrofti</i>      | 1      | 0        | 0      | 0        |
| Apidae         | <i>Bombus</i>         | <i>bimaculatus</i>    | 0      | 1        | 5      | 5        |
|                | <i>Bombus</i>         | <i>citrinus</i>       | 0      | 0        | 1      | 0        |
|                | <i>Bombus</i>         | <i>griseocollis</i>   | 1      | 1        | 2      | 2        |
|                | <i>Bombus</i>         | <i>impatiens</i>      | 4      | 3        | 3      | 3        |
|                | <i>Bombus</i>         | <i>pennsylvanicus</i> | 0      | 0        | 2      | 1        |
|                | <i>Bombus</i>         | <i>perplexus</i>      | 0      | 1        | 0      | 0        |
|                | <i>Bombus</i>         | <i>vagans</i>         | 0      | 0        | 2      | 4        |
|                | <i>Bombus</i>         | <i>variabilis</i>     | 0      | 1        | 1      | 0        |
|                | <i>Ceratina</i>       | <i>calcarata</i>      | 0      | 0        | 3      | 0        |
|                | <i>Ceratina</i>       | <i>dupla</i>          | 0      | 1        | 6      | 0        |
|                | <i>Ceratina</i>       | <i>strenua</i>        | 0      | 1        | 0      | 0        |
|                | <i>Eucera</i>         | <i>atriventris</i>    | 0      | 0        | 0      | 1        |
|                | <i>Eucera</i>         | <i>hammata</i>        | 0      | 0        | 1      | 8        |
|                | <i>Melissodes</i>     | <i>agilis</i>         | 1      | 7        | 2      | 3        |
|                | <i>Melissodes</i>     | <i>bimaculata</i>     | 20     | 213      | 27     | 50       |
|                | <i>Melissodes</i>     | <i>boltoniae</i>      | 1      | 1        | 1      | 1        |
|                | <i>Melissodes</i>     | <i>communis</i>       | 0      | 5        | 0      | 2        |
|                | <i>Melissodes</i>     | <i>desponsa</i>       | 1      | 2        | 0      | 3        |
|                | <i>Melissodes</i>     | <i>trinodis</i>       | 1      | 9        | 2      | 3        |
|                | <i>Melissodes</i>     | <i>veroninae</i>      | 1      | 0        | 0      | 0        |
|                | <i>Nomada</i>         | <i>vegana</i>         | 1      | 0        | 0      | 1        |
|                | <i>Peponapis</i>      | <i>pruinosa</i>       | 4      | 10       | 2      | 0        |
| <i>Svastra</i> | <i>compta</i>         | 0                     | 1      | 0        | 0      |          |
| Collectidae    | <i>Colletes</i>       | <i>consars</i>        | 0      | 1        | 0      | 0        |
|                | <i>Hylaeus</i>        | <i>affinis</i>        | 0      | 1        | 2      | 2        |
|                | <i>Hylaeus</i>        | <i>annulatus</i>      | 0      | 2        | 2      | 0        |
| Halictidae     | <i>Agapostemon</i>    | <i>texanus</i>        | 2      | 20       | 23     | 102      |
|                | <i>Agapostemon</i>    | <i>virescens</i>      | 30     | 161      | 65     | 112      |
|                | <i>Augochlora</i>     | <i>pura</i>           | 1      | 0        | 10     | 10       |
|                | <i>Augochlorella</i>  | <i>aurata</i>         | 7      | 18       | 16     | 20       |
|                | <i>Augochloropsis</i> | <i>metallica</i>      | 2      | 3        | 2      | 0        |
|                | <i>Dieunomia</i>      | <i>triangulifera</i>  | 0      | 0        | 0      | 5        |
|                | <i>Halictus</i>       | <i>confusus</i>       | 0      | 4        | 11     | 81       |
|                | <i>Halictus</i>       | <i>ligatus</i>        | 8      | 94       | 7      | 57       |
|                | <i>Halictus</i>       | <i>parallelus</i>     | 1      | 4        | 40     | 29       |
|                | <i>Halictus</i>       | <i>rubicundus</i>     | 2      | 6        | 6      | 20       |
|                | <i>Halictus</i>       | <i>tripartitus</i>    | 0      | 0        | 0      | 2        |

**Table S3 Continued.**

| Family                          | Genus                            | Species              | 2015   |          | 2016   |          |
|---------------------------------|----------------------------------|----------------------|--------|----------|--------|----------|
|                                 |                                  |                      | Div-FV | Mono-SOY | Div-FV | Mono-SOY |
| Halictidae                      | <i>Lasioglossum (Evyllaesus)</i> | <i>sp 1</i>          | 3      | 11       | 70     | 63       |
|                                 | <i>Lasioglossum (Evyllaesus)</i> | <i>sp 2</i>          | 1      | 1        | 1      | 12       |
|                                 | <i>Lasioglossum (Dialictus)</i>  | <i>sp 1</i>          | 41     | 146      | 181    | 442      |
|                                 | <i>Lasioglossum (Dialictus)</i>  | <i>sp 2</i>          | 14     | 81       | 47     | 100      |
|                                 | <i>Lasioglossum (Dialictus)</i>  | <i>sp 3</i>          | 4      | 3        | 2      | 8        |
|                                 | <i>Lasioglossum (Dialictus)</i>  | <i>sp 4</i>          | 3      | 1        | 5      | 7        |
|                                 | <i>Lasioglossum (Dialictus)</i>  | <i>sp 5</i>          | 0      | 0        | 0      | 22       |
|                                 | <i>Lasioglossum (Dialictus)</i>  | <i>sp 6</i>          | 4      | 31       | 32     | 65       |
|                                 | <i>Lasioglossum (Dialictus)</i>  | <i>sp 7</i>          | 0      | 1        | 0      | 2        |
|                                 | <i>Lasioglossum (Dialictus)</i>  | <i>sp 8</i>          | 0      | 12       | 1      | 0        |
|                                 | <i>Lasioglossum (Dialictus)</i>  | <i>sp 9</i>          | 5      | 11       | 34     | 67       |
|                                 | <i>Lasioglossum (Dialictus)</i>  | <i>sp 10</i>         | 0      | 0        | 2      | 1        |
|                                 | <i>Lasioglossum (Dialictus)</i>  | <i>sp 11</i>         | 0      | 0        | 1      | 3        |
|                                 | <i>Lasioglossum (Dialictus)</i>  | <i>sp 12</i>         | 53     | 39       | 45     | 48       |
|                                 | <i>Lasioglossum (Dialictus)</i>  | <i>sp 13</i>         | 0      | 0        | 0      | 6        |
|                                 | <i>Lasioglossum (Dialictus)</i>  | <i>sp 14</i>         | 4      | 132      | 38     | 298      |
|                                 | <i>Lasioglossum (Dialictus)</i>  | <i>sp 15</i>         | 0      | 0        | 0      | 6        |
|                                 | <i>Lasioglossum (Dialictus)</i>  | <i>sp 16</i>         | 0      | 0        | 0      | 4        |
|                                 | <i>Lasioglossum (Dialictus)</i>  | <i>sp 17</i>         | 0      | 0        | 0      | 1        |
|                                 | <i>Lasioglossum (Dialictus)</i>  | <i>sp 18</i>         | 0      | 1        | 0      | 54       |
|                                 | <i>Lasioglossum (Dialictus)</i>  | <i>sp 19</i>         | 0      | 0        | 0      | 6        |
|                                 | <i>Lasioglossum (Dialictus)</i>  | <i>sp 20</i>         | 0      | 0        | 3      | 5        |
|                                 | <i>Lasioglossum (Dialictus)</i>  | <i>sp 21</i>         | 0      | 0        | 1      | 1        |
|                                 | <i>Lasioglossum (Dialictus)</i>  | <i>sp 22</i>         | 2      | 0        | 1      | 3        |
|                                 | <i>Lasioglossum (Dialictus)</i>  | <i>sp 23</i>         | 2      | 5        | 6      | 7        |
|                                 | <i>Lasioglossum (Dialictus)</i>  | <i>sp 24</i>         | 0      | 0        | 5      | 15       |
|                                 | <i>Lasioglossum (Dialictus)</i>  | <i>sp 25</i>         | 13     | 6        | 12     | 28       |
|                                 | <i>Lasioglossum (Dialictus)</i>  | <i>sp 26</i>         | 0      | 0        | 0      | 12       |
|                                 | <i>Lasioglossum (Dialictus)</i>  | <i>sp 27</i>         | 0      | 0        | 0      | 1        |
|                                 | <i>Lasioglossum (Dialictus)</i>  | <i>sp 28</i>         | 0      | 0        | 0      | 1        |
|                                 | <i>Lasioglossum (Dialictus)</i>  | <i>sp 29</i>         | 5      | 3        | 1      | 1        |
|                                 | <i>Lasioglossum (Dialictus)</i>  | <i>sp 30</i>         | 2      | 1        | 3      | 3        |
|                                 | <i>Lasioglossum (Dialictus)</i>  | <i>sp 31</i>         | 6      | 0        | 10     | 7        |
| <i>Lasioglossum (Dialictus)</i> | <i>sp 32</i>                     | 0                    | 0      | 0        | 1      |          |
| <i>Lasioglossum (Dialictus)</i> | <i>sp 33</i>                     | 0                    | 0      | 0        | 1      |          |
|                                 | <i>Nomia</i>                     | <i>universitatis</i> | 0      | 1        | 0      | 0        |
|                                 | <i>Sphecodes</i>                 | <i>davisii</i>       | 1      | 0        | 0      | 0        |
| Megachilidae                    | <i>Ashmeadiella</i>              | <i>bucconis</i>      | 1      | 0        | 0      | 0        |
|                                 | <i>Megachile</i>                 | <i>brevis</i>        | 0      | 0        | 0      | 1        |
|                                 | <i>Megachile</i>                 | <i>parallela</i>     | 0      | 0        | 0      | 1        |

**Table S4.** Abundance, richness, and diversity of the wild bee community in Div-FV and Mono-SOY farms in central Iowa in 2015 and 2016.

|                        | <b>Effect</b>          | <b>Num DF</b> | <b>Den DF</b> | <b>F Value</b> | <b>Pr &gt; F</b> |
|------------------------|------------------------|---------------|---------------|----------------|------------------|
| <b>Abundance</b>       | <i>Year</i>            | 1             | 28.03         | 1.72           | 0.1998           |
|                        | <i>Farm Type</i>       | 1             | 24.9          | 0.96           | 0.3377           |
|                        | <i>Month</i>           | 3             | 125           | 4.27           | <b>0.0066</b>    |
|                        | <i>Farm Type*Month</i> | 3             | 129.5         | 1.09           | 0.3567           |
|                        | <i>Woodland</i>        | 1             | 23.07         | 1.22           | 0.2816           |
|                        | <i>Grassland</i>       | 1             | 24.65         | 0.02           | 0.8877           |
|                        | <i>Developed</i>       | 1             | 23.01         | 0.26           | 0.6140           |
|                        | <b>Richness</b>        | <i>Year</i>   | 1             | 29.32          | 8.87             |
| <i>Farm Type</i>       |                        | 1             | 25.39         | 3.78           | 0.0630           |
| <i>Month</i>           |                        | 3             | 125.5         | 14.58          | <b>&lt;.0001</b> |
| <i>Farm Type*Month</i> |                        | 3             | 130.5         | 0.82           | 0.4842           |
| <i>Woodland</i>        |                        | 1             | 23.19         | 2.65           | 0.1172           |
| <i>Grassland</i>       |                        | 1             | 25.14         | 0.34           | 0.5672           |
| <i>Developed</i>       |                        | 1             | 23.11         | 0.28           | 0.6006           |
| <b>Diversity</b>       |                        | <i>Year</i>   | 1             | 32.88          | 7.03             |
|                        | <i>Farm Type</i>       | 1             | 25.23         | 6.46           | <b>0.0175</b>    |
|                        | <i>Month</i>           | 3             | 125.7         | 14.41          | <b>&lt;.0001</b> |
|                        | <i>Farm Type*Month</i> | 3             | 132.1         | 0.42           | 0.7398           |
|                        | <i>Woodland</i>        | 1             | 21.54         | 1.25           | 0.2759           |
|                        | <i>Grassland</i>       | 1             | 25.18         | 1.15           | 0.2929           |
|                        | <i>Developed</i>       | 1             | 21.45         | 0.10           | 0.7577           |

**Table S5.** Post hoc comparisons of least squares means comparing bee abundance, richness, and diversity between Div-FV and Mono-SOY farms in central Iowa during each month of the sampling season in 2015 and 2016.

|           | Month            | Farm Type     | Farm Type       | Estimate | SE      | DF    | t Value | Pr >  t       |
|-----------|------------------|---------------|-----------------|----------|---------|-------|---------|---------------|
| Abundance | <i>June</i>      | <i>Div-FV</i> | <i>Mono-SOY</i> | 0.09105  | 12.1488 | 88.91 | 0.01    | 0.9940        |
|           | <i>July</i>      | <i>Div-FV</i> | <i>Mono-SOY</i> | -5.9352  | 10.6245 | 72.23 | -0.56   | 0.5781        |
|           | <i>August</i>    | <i>Div-FV</i> | <i>Mono-SOY</i> | -19.5232 | 9.5123  | 52.24 | -2.05   | <b>0.0452</b> |
|           | <i>September</i> | <i>Div-FV</i> | <i>Mono-SOY</i> | -5.1502  | 12.2099 | 101.9 | -0.42   | 0.6741        |
| Richness  | <i>June</i>      | <i>Div-FV</i> | <i>Mono-SOY</i> | -0.4263  | 1.3694  | 95.76 | -0.31   | 0.7562        |
|           | <i>July</i>      | <i>Div-FV</i> | <i>Mono-SOY</i> | -1.5084  | 1.1896  | 82.11 | -1.27   | 0.2084        |
|           | <i>August</i>    | <i>Div-FV</i> | <i>Mono-SOY</i> | -2.6439  | 1.0526  | 59.29 | -2.51   | <b>0.0148</b> |
|           | <i>September</i> | <i>Div-FV</i> | <i>Mono-SOY</i> | -1.9199  | 1.3845  | 113.5 | -1.39   | 0.1683        |
| Diversity | <i>June</i>      | <i>Div-FV</i> | <i>Mono-SOY</i> | -0.2173  | 0.2051  | 105.5 | -1.06   | 0.2919        |
|           | <i>July</i>      | <i>Div-FV</i> | <i>Mono-SOY</i> | -0.2377  | 0.1772  | 112.4 | -1.34   | 0.1823        |
|           | <i>August</i>    | <i>Div-FV</i> | <i>Mono-SOY</i> | -0.1722  | 0.1515  | 86.4  | -1.14   | 0.2588        |
|           | <i>September</i> | <i>Div-FV</i> | <i>Mono-SOY</i> | -0.4487  | 0.2139  | 138.6 | -2.10   | <b>0.0378</b> |



**Table S6.** Abundance of individual common wild bee species in Div-FV and Mono-SOY farms in central Iowa in 2015 and 2016.

|                              |                        | Effect | Num DF | Den DF | F Value       | Pr > F |                                     |                        | Effect | Num DF | Den DF | F Value       | Pr > F |
|------------------------------|------------------------|--------|--------|--------|---------------|--------|-------------------------------------|------------------------|--------|--------|--------|---------------|--------|
| <i>Agapostemon virescens</i> | <i>Year</i>            | 1      | 30.8   | 1.68   | 0.2047        |        | <i>Agapostemon texanus</i>          | <i>Year</i>            | 1      | 31.03  | 10.45  | <b>0.0029</b> |        |
|                              | <i>Farm Type</i>       | 1      | 25.11  | 0.45   | 0.5088        |        |                                     | <i>Farm Type</i>       | 1      | 26.46  | 0.60   | 0.4443        |        |
|                              | <i>Month</i>           | 3      | 125.4  | 4.87   | <b>0.0031</b> |        |                                     | <i>Month</i>           | 3      | 126.4  | 1.65   | 0.1804        |        |
|                              | <i>Farm Type*Month</i> | 3      | 131.4  | 1.50   | 0.2169        |        |                                     | <i>Farm Type*Month</i> | 3      | 131.5  | 1.23   | 0.3019        |        |
|                              | <i>Woodland</i>        | 1      | 22.16  | 0.75   | 0.3953        |        |                                     | <i>Woodland</i>        | 1      | 23.95  | 0.32   | 0.5780        |        |
|                              | <i>Grassland</i>       | 1      | 24.93  | 3.83   | 0.0616        |        |                                     | <i>Grassland</i>       | 1      | 26.21  | 0.00   | 0.9575        |        |
|                              | <i>Developed</i>       | 1      | 22.08  | 0.47   | 0.5010        |        |                                     | <i>Developed</i>       | 1      | 23.87  | 0.35   | 0.5570        |        |
| <i>Melissodes bimaculata</i> | <i>Year</i>            | 1      | 146    | 4.87   | <b>0.0290</b> |        | <i>Halictus ligatus</i>             | <i>Year</i>            | 1      | 27.76  | 0.81   | 0.3751        |        |
|                              | <i>Farm Type</i>       | 1      | 146    | 3.95   | <b>0.0487</b> |        |                                     | <i>Farm Type</i>       | 1      | 23.44  | 3.78   | 0.0640        |        |
|                              | <i>Month</i>           | 3      | 146    | 6.07   | <b>0.0006</b> |        |                                     | <i>Month</i>           | 3      | 123.8  | 1.25   | 0.2939        |        |
|                              | <i>Farm Type*Month</i> | 3      | 146    | 1.51   | 0.2137        |        |                                     | <i>Farm Type*Month</i> | 3      | 129.6  | 1.21   | 0.3093        |        |
|                              | <i>Woodland</i>        | 1      | 146    | 0.09   | 0.7663        |        |                                     | <i>Woodland</i>        | 1      | 21.09  | 0.30   | 0.5871        |        |
|                              | <i>Grassland</i>       | 1      | 146    | 8.70   | <b>0.0037</b> |        |                                     | <i>Grassland</i>       | 1      | 23.22  | 5.99   | <b>0.0223</b> |        |
|                              | <i>Developed</i>       | 1      | 146    | 0.06   | 0.8121        |        |                                     | <i>Developed</i>       | 1      | 21.02  | 0.05   | 0.8213        |        |
| <i>Halictus confusus</i>     | <i>Year</i>            | 1      | 29.09  | 11.83  | <b>0.0018</b> |        | <i>Halictus parallelus</i>          | <i>Year</i>            | 1      | 33.57  | 2.14   | 0.1525        |        |
|                              | <i>Farm Type</i>       | 1      | 25.83  | 0.24   | 0.6251        |        |                                     | <i>Farm Type</i>       | 1      | 27.12  | 1.22   | 0.2788        |        |
|                              | <i>Month</i>           | 3      | 125.8  | 4.08   | <b>0.0084</b> |        |                                     | <i>Month</i>           | 3      | 127.1  | 1.00   | 0.3941        |        |
|                              | <i>Farm Type*Month</i> | 3      | 130.2  | 1.33   | 0.2684        |        |                                     | <i>Farm Type*Month</i> | 3      | 132.8  | 0.85   | 0.4712        |        |
|                              | <i>Woodland</i>        | 1      | 23.93  | 0.04   | 0.8392        |        |                                     | <i>Woodland</i>        | 1      | 23.81  | 3.93   | 0.0592        |        |
|                              | <i>Grassland</i>       | 1      | 25.57  | 0.51   | 0.4800        |        |                                     | <i>Grassland</i>       | 1      | 26.95  | 0.35   | 0.5607        |        |
|                              | <i>Developed</i>       | 1      | 23.86  | 3.47   | 0.0747        |        |                                     | <i>Developed</i>       | 1      | 23.72  | 1.76   | 0.1974        |        |
| <i>Augochlorella aurata</i>  | <i>Year</i>            | 1      | 31.43  | 0.75   | 0.3936        |        | <i>Lasiglossum (Dialictus) sp 1</i> | <i>Year</i>            | 1      | 30.18  | 3.09   | 0.0889        |        |
|                              | <i>Farm Type</i>       | 1      | 25.89  | 0.50   | 0.4860        |        |                                     | <i>Farm Type</i>       | 1      | 25.31  | 0.59   | 0.4513        |        |
|                              | <i>Month</i>           | 3      | 126    | 1.46   | 0.2289        |        |                                     | <i>Month</i>           | 3      | 125.5  | 3.03   | <b>0.0321</b> |        |
|                              | <i>Farm Type*Month</i> | 3      | 131.8  | 0.59   | 0.6226        |        |                                     | <i>Farm Type*Month</i> | 3      | 131.1  | 0.43   | 0.7313        |        |
|                              | <i>Woodland</i>        | 1      | 22.98  | 0.14   | 0.7150        |        |                                     | <i>Woodland</i>        | 1      | 22.69  | 6.06   | <b>0.0218</b> |        |
|                              | <i>Grassland</i>       | 1      | 25.69  | 0.02   | 0.8950        |        |                                     | <i>Grassland</i>       | 1      | 25.08  | 1.02   | 0.3221        |        |
|                              | <i>Developed</i>       | 1      | 22.89  | 0.46   | 0.5055        |        |                                     | <i>Developed</i>       | 1      | 22.61  | 0.96   | 0.3370        |        |

Table S6 Continued.

*Lasioglossum*  
(*Dialictus*) sp 2

| Effect          | Num DF | Den DF | F Value | Pr > F |
|-----------------|--------|--------|---------|--------|
| Year            | 1      | 28.77  | 0.06    | 0.8147 |
| Farm Type       | 1      | 24.25  | 1.22    | 0.2807 |
| Month           | 3      | 124.6  | 1.76    | 0.1587 |
| Farm Type*Month | 3      | 130.3  | 1.51    | 0.2143 |
| Woodland        | 1      | 21.8   | 2.91    | 0.1022 |
| Grassland       | 1      | 24.03  | 0.32    | 0.5775 |
| Developed       | 1      | 21.73  | 0.89    | 0.3554 |

*L. (Dialictus)* sp 9

|                 |   |     |      |               |
|-----------------|---|-----|------|---------------|
| Year            | 1 | 146 | 7.74 | <b>0.0061</b> |
| Farm Type       | 1 | 146 | 0.16 | 0.6937        |
| Month           | 3 | 146 | 5.40 | <b>0.0015</b> |
| Farm Type*Month | 3 | 146 | 0.20 | 0.8987        |
| Woodland        | 1 | 146 | 7.91 | <b>0.0056</b> |
| Grassland       | 1 | 146 | 0.80 | 0.3714        |
| Developed       | 1 | 146 | 0.07 | 0.7989        |

*L. (Dialictus)* sp 14

|                 |   |       |      |               |
|-----------------|---|-------|------|---------------|
| Year            | 1 | 27.38 | 6.18 | <b>0.0193</b> |
| Farm Type       | 1 | 24.23 | 0.72 | 0.4036        |
| Month           | 3 | 124.4 | 2.59 | 0.0557        |
| Farm Type*Month | 3 | 129.1 | 0.98 | 0.4036        |
| Woodland        | 1 | 22.41 | 4.41 | <b>0.0471</b> |
| Grassland       | 1 | 23.99 | 0.19 | 0.6684        |
| Developed       | 1 | 22.34 | 0.27 | 0.6060        |

*L. (Dialictus)* sp 25

|                 |   |       |      |               |
|-----------------|---|-------|------|---------------|
| Year            | 1 | 29.43 | 0.99 | 0.3274        |
| Farm Type       | 1 | 24.01 | 0.60 | 0.4480        |
| Month           | 3 | 124.4 | 2.88 | <b>0.0387</b> |
| Farm Type*Month | 3 | 130.7 | 0.61 | 0.6082        |
| Woodland        | 1 | 21.19 | 0.41 | 0.5273        |
| Grassland       | 1 | 23.82 | 1.59 | 0.2200        |
| Developed       | 1 | 21.11 | 0.59 | 0.4514        |

*L. (Dialictus)* sp 6

| Effect          | Num DF | Den DF | F Value | Pr > F |
|-----------------|--------|--------|---------|--------|
| Year            | 1      | 146    | 2.32    | 0.1295 |
| Farm Type       | 1      | 146    | 0.13    | 0.7178 |
| Month           | 3      | 146    | 1.54    | 0.2057 |
| Farm Type*Month | 3      | 146    | 1.93    | 0.1269 |
| Woodland        | 1      | 146    | 0.89    | 0.3474 |
| Grassland       | 1      | 146    | 0.02    | 0.9014 |
| Developed       | 1      | 146    | 0.04    | 0.8398 |

*L. (Dialictus)* sp 12

|                 |   |       |      |               |
|-----------------|---|-------|------|---------------|
| Year            | 1 | 26.78 | 1.12 | 0.2998        |
| Farm Type       | 1 | 21.17 | 0.75 | 0.3960        |
| Month           | 3 | 121.6 | 5.40 | <b>0.0016</b> |
| Farm Type*Month | 3 | 128.9 | 1.05 | 0.3711        |
| Woodland        | 1 | 18.37 | 5.37 | <b>0.0322</b> |
| Grassland       | 1 | 21.05 | 1.01 | 0.3262        |
| Developed       | 1 | 18.3  | 0.41 | 0.5295        |

*L. (Dialictus)* sp 18

|                 |   |     |      |               |
|-----------------|---|-----|------|---------------|
| Year            | 1 | 146 | 0.01 | 0.9259        |
| Farm Type       | 1 | 146 | 0.19 | 0.6653        |
| Month           | 3 | 146 | 0.69 | 0.5578        |
| Farm Type*Month | 3 | 146 | 0.41 | 0.7471        |
| Woodland        | 1 | 146 | 0.22 | 0.6427        |
| Grassland       | 1 | 146 | 0.94 | 0.3330        |
| Developed       | 1 | 146 | 5.08 | <b>0.0258</b> |

*L. (Evyllaes)* sp 1

|                 |   |       |      |               |
|-----------------|---|-------|------|---------------|
| Year            | 1 | 36.31 | 0.03 | 0.8637        |
| Farm Type       | 1 | 28.8  | 1.10 | 0.3028        |
| Month           | 3 | 128.3 | 6.48 | <b>0.0004</b> |
| Farm Type*Month | 3 | 133.8 | 2.11 | 0.1018        |
| Woodland        | 1 | 25.02 | 0.54 | 0.4694        |
| Grassland       | 1 | 28.67 | 0.07 | 0.7923        |
| Developed       | 1 | 24.93 | 0.41 | 0.5301        |

**Table S7.** Post hoc comparisons of least squares means comparing bee abundance of individual species between Div-FV and Mono-SOY farms in central Iowa during each month of the sampling season in 2015 and 2016.

|                                      | Month     | Farm Type | Farm Type | Estimate | SE     | DF    | t Value | Pr >  t       |
|--------------------------------------|-----------|-----------|-----------|----------|--------|-------|---------|---------------|
| <i>Agapostemon virescens</i>         | June      | Div-FV    | Mono-SOY  | 1.2666   | 1.9506 | 102.9 | 0.65    | 0.5176        |
|                                      | July      | Div-FV    | Mono-SOY  | 0.1775   | 1.6837 | 99.03 | 0.11    | 0.9162        |
|                                      | August    | Div-FV    | Mono-SOY  | -2.8954  | 1.4598 | 72.85 | -1.98   | <b>0.0511</b> |
|                                      | September | Div-FV    | Mono-SOY  | -1.4517  | 2.0020 | 129.7 | -0.73   | 0.4697        |
| <i>Agapostemon texanus</i>           | June      | Div-FV    | Mono-SOY  | 0.6006   | 0.8631 | 100.2 | 0.70    | 0.4881        |
|                                      | July      | Div-FV    | Mono-SOY  | -0.3223  | 0.7477 | 89.24 | -0.43   | 0.6675        |
|                                      | August    | Div-FV    | Mono-SOY  | -1.1486  | 0.6572 | 65.12 | -1.75   | 0.0852        |
|                                      | September | Div-FV    | Mono-SOY  | -0.7177  | 0.8762 | 120.3 | -0.82   | 0.4144        |
| <i>Melissodes bimaculata</i>         | June      | Div-FV    | Mono-SOY  | -1.3102  | 1.8950 | 146   | -0.69   | 0.4904        |
|                                      | July      | Div-FV    | Mono-SOY  | -0.7652  | 1.6400 | 146   | -0.47   | 0.6415        |
|                                      | August    | Div-FV    | Mono-SOY  | -4.5269  | 1.3944 | 146   | -3.25   | <b>0.0014</b> |
|                                      | September | Div-FV    | Mono-SOY  | -0.9337  | 1.9924 | 146   | -0.47   | 0.6400        |
| <i>Halictus ligatus</i>              | June      | Div-FV    | Mono-SOY  | -2.0284  | 1.2131 | 96.32 | -1.67   | 0.0978        |
|                                      | July      | Div-FV    | Mono-SOY  | -0.8111  | 1.0501 | 85.78 | -0.77   | 0.4420        |
|                                      | August    | Div-FV    | Mono-SOY  | -2.4637  | 0.9212 | 61.17 | -2.67   | <b>0.0096</b> |
|                                      | September | Div-FV    | Mono-SOY  | -0.2336  | 1.2332 | 118.8 | -0.19   | 0.8501        |
| <i>Halictus confusus</i>             | June      | Div-FV    | Mono-SOY  | 0.8030   | 0.7483 | 90.8  | 1.07    | 0.2861        |
|                                      | July      | Div-FV    | Mono-SOY  | -0.7044  | 0.6542 | 74.33 | -1.08   | 0.2851        |
|                                      | August    | Div-FV    | Mono-SOY  | -0.5861  | 0.5853 | 54.06 | -1.00   | 0.3211        |
|                                      | September | Div-FV    | Mono-SOY  | -0.4607  | 0.7523 | 103.9 | -0.61   | 0.5417        |
| <i>Halictus parallelus</i>           | June      | Div-FV    | Mono-SOY  | 0.1586   | 0.4538 | 79.24 | 0.35    | 0.7277        |
|                                      | July      | Div-FV    | Mono-SOY  | -0.1687  | 0.5252 | 105.1 | -0.32   | 0.7486        |
|                                      | August    | Div-FV    | Mono-SOY  | 0.9700   | 0.6086 | 106.5 | 1.59    | 0.1140        |
|                                      | September | Div-FV    | Mono-SOY  | 0.5081   | 0.6268 | 133.3 | 0.81    | 0.4190        |
| <i>Augochlorella aurata</i>          | June      | Div-FV    | Mono-SOY  | 0.3342   | 0.3983 | 103.3 | 0.84    | 0.4033        |
|                                      | July      | Div-FV    | Mono-SOY  | 0.1334   | 0.3439 | 97.97 | 0.39    | 0.6990        |
|                                      | August    | Div-FV    | Mono-SOY  | -0.1570  | 0.2989 | 72.18 | -0.53   | 0.6011        |
|                                      | September | Div-FV    | Mono-SOY  | 0.3221   | 0.4078 | 128.5 | 0.79    | 0.4311        |
| <i>Lasioglossum (Dialictus) sp 1</i> | June      | Div-FV    | Mono-SOY  | -4.1450  | 4.4768 | 100.5 | -0.93   | 0.3567        |
|                                      | July      | Div-FV    | Mono-SOY  | 0.7377   | 3.8711 | 91.89 | 0.19    | 0.8493        |
|                                      | August    | Div-FV    | Mono-SOY  | -3.6402  | 3.3846 | 66.79 | -1.08   | 0.2860        |
|                                      | September | Div-FV    | Mono-SOY  | -0.8701  | 4.5622 | 123.5 | -0.19   | 0.8491        |

**Table S7 Continued.**

|                                                            | Month     | Farm Type | Farm Type | Estimate | SE     | DF    | t Value | Pr >  t       |
|------------------------------------------------------------|-----------|-----------|-----------|----------|--------|-------|---------|---------------|
| <i>Lasioglossum</i><br>( <i>Dialictus</i> )<br><i>sp 2</i> | June      | Div-FV    | Mono-SOY  | 0.8265   | 1.4448 | 98.05 | 0.57    | 0.5686        |
|                                                            | July      | Div-FV    | Mono-SOY  | -1.0007  | 1.2502 | 88.1  | -0.80   | 0.4256        |
|                                                            | August    | Div-FV    | Mono-SOY  | -2.4910  | 1.0957 | 63.32 | -2.27   | <b>0.0264</b> |
|                                                            | September | Div-FV    | Mono-SOY  | -1.0602  | 1.4698 | 120.6 | -0.72   | 0.4721        |
| <i>L. (Dialictus)</i><br><i>sp 6</i>                       | June      | Div-FV    | Mono-SOY  | 1.6913   | 0.8316 | 146   | 2.03    | <b>0.0438</b> |
|                                                            | July      | Div-FV    | Mono-SOY  | -0.5338  | 0.7197 | 146   | -0.74   | 0.4595        |
|                                                            | August    | Div-FV    | Mono-SOY  | -0.5152  | 0.6119 | 146   | -0.84   | 0.4012        |
|                                                            | September | Div-FV    | Mono-SOY  | -0.04009 | 0.8743 | 146   | -0.05   | 0.9635        |
| <i>L. (Dialictus)</i><br><i>sp 9</i>                       | June      | Div-FV    | Mono-SOY  | 0.3423   | 0.9149 | 146   | 0.37    | 0.7089        |
|                                                            | July      | Div-FV    | Mono-SOY  | -0.4986  | 0.7918 | 146   | -0.63   | 0.5298        |
|                                                            | August    | Div-FV    | Mono-SOY  | -0.3707  | 0.6732 | 146   | -0.55   | 0.5827        |
|                                                            | September | Div-FV    | Mono-SOY  | -0.1952  | 0.9619 | 146   | -0.20   | 0.8395        |
| <i>L. (Dialictus)</i><br><i>sp 12</i>                      | June      | Div-FV    | Mono-SOY  | 0.9081   | 1.3687 | 97.93 | 0.66    | 0.5086        |
|                                                            | July      | Div-FV    | Mono-SOY  | 0.03030  | 1.1809 | 98.18 | 0.03    | 0.9796        |
|                                                            | August    | Div-FV    | Mono-SOY  | 2.0410   | 1.0179 | 70.58 | 2.01    | <b>0.0488</b> |
|                                                            | September | Div-FV    | Mono-SOY  | -0.4231  | 1.4130 | 131.3 | -0.30   | 0.7651        |
| <i>L. (Dialictus)</i><br><i>sp 14</i>                      | June      | Div-FV    | Mono-SOY  | -0.02621 | 2.2782 | 88.54 | -0.01   | 0.9908        |
|                                                            | July      | Div-FV    | Mono-SOY  | -2.6585  | 1.9906 | 72.06 | -1.34   | 0.1859        |
|                                                            | August    | Div-FV    | Mono-SOY  | -2.7589  | 1.7797 | 51.82 | -1.55   | 0.1272        |
|                                                            | September | Div-FV    | Mono-SOY  | 0.4973   | 2.2910 | 102.3 | 0.22    | 0.8286        |
| <i>L. (Dialictus)</i><br><i>sp 18</i>                      | June      | Div-FV    | Mono-SOY  | -1.6406  | 1.4932 | 146   | -1.10   | 0.2737        |
|                                                            | July      | Div-FV    | Mono-SOY  | -0.05712 | 1.2923 | 146   | -0.04   | 0.9648        |
|                                                            | August    | Div-FV    | Mono-SOY  | 0.1955   | 1.0988 | 146   | 0.18    | 0.8590        |
|                                                            | September | Div-FV    | Mono-SOY  | 0.2074   | 1.5700 | 146   | 0.13    | 0.8951        |
| <i>L. (Dialictus)</i><br><i>sp 25</i>                      | June      | Div-FV    | Mono-SOY  | 0.3144   | 0.5309 | 101   | 0.59    | 0.5551        |
|                                                            | July      | Div-FV    | Mono-SOY  | 0.002307 | 0.4583 | 96.71 | 0.01    | 0.9960        |
|                                                            | August    | Div-FV    | Mono-SOY  | 0.6286   | 0.3976 | 70.36 | 1.58    | 0.1184        |
|                                                            | September | Div-FV    | Mono-SOY  | -0.03306 | 0.5445 | 128.5 | -0.06   | 0.9517        |
| <i>L. (Evyllaesus)</i><br><i>sp 1</i>                      | June      | Div-FV    | Mono-SOY  | 3.9910   | 1.5767 | 109.5 | 2.53    | 0.0128        |
|                                                            | July      | Div-FV    | Mono-SOY  | 0.000745 | 1.3606 | 111.9 | 0.00    | 0.9996        |
|                                                            | August    | Div-FV    | Mono-SOY  | -0.2495  | 1.1693 | 86.82 | -0.21   | 0.8316        |
|                                                            | September | Div-FV    | Mono-SOY  | -0.2306  | 1.6334 | 137.1 | -0.14   | 0.8880        |

**Table S8.** Abundance, richness, and diversity of the wild bee community in Div-FV and Mono-SOY farms in central Iowa in 2015 and 2016 with the common agricultural species *Lasioglossum (Dialictus) sp. 2*, *Agapostemon virescens*, *Melissodes bimaculata*, and *Halictus ligatus* removed from the community.

|           | Effect                 | Num DF | Den DF | F Value | Pr > F           |
|-----------|------------------------|--------|--------|---------|------------------|
| Abundance | <i>Year</i>            | 1      | 28.3   | 6.13    | <b>0.0196</b>    |
|           | <i>Farm Type</i>       | 1      | 25.15  | 0.18    | 0.6753           |
|           | <i>Month</i>           | 3      | 125.2  | 3.91    | <b>0.0104</b>    |
|           | <i>Farm Type*Month</i> | 3      | 129.7  | 0.34    | 0.7973           |
|           | <i>Woodland</i>        | 1      | 23.32  | 2.25    | 0.1467           |
|           | <i>Developed</i>       | 1      | 23.25  | 1.11    | 0.3037           |
|           | <i>Grassland</i>       | 1      | 24.9   | 1.02    | 0.3212           |
| Richness  | <i>Year</i>            | 1      | 30.04  | 16.42   | <b>0.0003</b>    |
|           | <i>Farm Type</i>       | 1      | 25.37  | 1.42    | 0.2452           |
|           | <i>Month</i>           | 3      | 125.5  | 11.93   | <b>&lt;.0001</b> |
|           | <i>Farm Type*Month</i> | 3      | 131    | 0.79    | 0.5034           |
|           | <i>Woodland</i>        | 1      | 22.83  | 3.00    | 0.0968           |
|           | <i>Developed</i>       | 1      | 25.13  | 0.30    | 0.5861           |
|           | <i>Grassland</i>       | 1      | 22.75  | 0.23    | 0.6361           |
| Diversity | <i>Year</i>            | 1      | 30.05  | 11.64   | <b>0.0019</b>    |
|           | <i>Farm Type</i>       | 1      | 24.48  | 2.35    | 0.1379           |
|           | <i>Month</i>           | 3      | 124.9  | 13.35   | <b>&lt;.0001</b> |
|           | <i>Farm Type*Month</i> | 3      | 131    | 1.43    | 0.2383           |
|           | <i>Woodland</i>        | 1      | 21.6   | 1.67    | 0.2093           |
|           | <i>Developed</i>       | 1      | 21.52  | 0.60    | 0.4454           |
|           | <i>Grassland</i>       | 1      | 24.3   | 0.22    | 0.6423           |

**Table S9.** Comparisons of least square means for abundance, richness, and diversity of the wild bee community across months in Div-FV and Mono-SOY farms in central Iowa in 2015 and 2016 with the common agricultural species *Lasioglossum (Dialictus)* sp. 2, *Agapostemon virescens*, *Melissodes bimaculata*, and *Halictus ligatus* removed from the community.

|           | Month            | Farm Type     | Farm Type       | Estimate | SE     | DF    | t Value | Pr >  t       |
|-----------|------------------|---------------|-----------------|----------|--------|-------|---------|---------------|
| Abundance | <i>June</i>      | <i>Div-FV</i> | <i>Mono-SOY</i> | 2.1423   | 9.0014 | 89.23 | 0.24    | 0.8124        |
|           | <i>July</i>      | <i>Div-FV</i> | <i>Mono-SOY</i> | -3.5796  | 7.8730 | 72.54 | -0.45   | 0.6507        |
|           | <i>August</i>    | <i>Div-FV</i> | <i>Mono-SOY</i> | -6.8115  | 7.0502 | 52.56 | -0.97   | 0.3384        |
|           | <i>September</i> | <i>Div-FV</i> | <i>Mono-SOY</i> | -1.5607  | 9.0459 | 102.1 | -0.17   | 0.8634        |
| Richness  | <i>June</i>      | <i>Div-FV</i> | <i>Mono-SOY</i> | 0.5078   | 1.1529 | 99.76 | 0.44    | 0.6606        |
|           | <i>July</i>      | <i>Div-FV</i> | <i>Mono-SOY</i> | -0.9857  | 0.9977 | 89.95 | -0.99   | 0.3258        |
|           | <i>August</i>    | <i>Div-FV</i> | <i>Mono-SOY</i> | -1.1754  | 0.8743 | 65.24 | -1.34   | 0.1835        |
|           | <i>September</i> | <i>Div-FV</i> | <i>Mono-SOY</i> | -1.5521  | 1.1728 | 121.6 | -1.32   | 0.1882        |
| Diversity | <i>June</i>      | <i>Div-FV</i> | <i>Mono-SOY</i> | -0.08664 | 0.2200 | 101.9 | -0.39   | 0.6945        |
|           | <i>July</i>      | <i>Div-FV</i> | <i>Mono-SOY</i> | -0.1719  | 0.1899 | 97.95 | -0.91   | 0.3674        |
|           | <i>August</i>    | <i>Div-FV</i> | <i>Mono-SOY</i> | 0.01567  | 0.1647 | 71.64 | 0.10    | 0.9245        |
|           | <i>September</i> | <i>Div-FV</i> | <i>Mono-SOY</i> | -0.5067  | 0.2258 | 129.2 | -2.24   | <b>0.0265</b> |

**Table S10.** Type III tests of fixed effects of honey bee colony weight compared between Div-FV and Mono-SOY farms in central Iowa for 2015 and 2016 combined.

| <b>Effect</b>              | <b>Num DF</b> | <b>Den DF</b> | <b>F Value</b> | <b>Pr &gt; F</b> |
|----------------------------|---------------|---------------|----------------|------------------|
| <i>Year</i>                | 1             | 39.83         | 29.96          | <b>&lt;.0001</b> |
| <i>Date</i>                | 5             | 122.7         | 78.98          | <b>&lt;.0001</b> |
| <i>Year*Date</i>           | 5             | 122.7         | 13.16          | <b>&lt;.0001</b> |
| <i>Treatment</i>           | 1             | 21.03         | 2.39           | 0.1366           |
| <i>Year*Treatment</i>      | 1             | 42.43         | 0.16           | 0.6873           |
| <i>Date*Treatment</i>      | 5             | 122.7         | 4.67           | <b>0.0006</b>    |
| <i>Year*Date*Treatment</i> | 5             | 122.7         | 10.40          | <b>&lt;.0001</b> |
| <i>Developed</i>           | 1             | 20.88         | 0.01           | 0.9152           |
| <i>Grassland</i>           | 1             | 21.01         | 0.01           | 0.9204           |
| <i>Woodland</i>            | 1             | 20.81         | 4.82           | <b>0.0397</b>    |

**Table S11.** Simple effects comparisons of least squares means with Tukey adjustment comparing colony weight between Div-FV and Mono-SOY farm across the season in central Iowa during 2015 and 2016.

| <i>Month</i>  | <i>Farm Type</i>       | <b>Estimate</b> | <b>SE</b> | <b>DF</b> | <b>t Value</b> | <b>Pr&gt; t </b> | <b>Adj P</b>  |
|---------------|------------------------|-----------------|-----------|-----------|----------------|------------------|---------------|
| <i>24-Jun</i> | <i>Div-FV Mono-SOY</i> | 2.0144          | 2.3708    | 45.7      | 0.85           | 0.3999           | 0.3972        |
| <i>8-Jul</i>  | <i>Div-FV Mono-SOY</i> | 7.2693          | 2.3708    | 45.7      | 3.07           | 0.0036           | <b>0.0027</b> |
| <i>22-Jul</i> | <i>Div-FV Mono-SOY</i> | -0.3622         | 2.3708    | 45.7      | -0.15          | 0.8792           | 0.8788        |
| <i>4-Aug</i>  | <i>Div-FV Mono-SOY</i> | 0.03135         | 2.3708    | 45.7      | 0.01           | 0.9895           | 0.9895        |
| <i>12-Sep</i> | <i>Div-FV Mono-SOY</i> | 2.1037          | 2.4487    | 50.88     | 0.86           | 0.3943           | 0.3919        |
| <i>12-Oct</i> | <i>Div-FV Mono-SOY</i> | 6.9137          | 2.4487    | 50.88     | 2.82           | 0.0068           | <b>0.0055</b> |



**Table S12.** Type III tests of fixed effects of honey bee colony growth metrics and nutritional state in colonies in Div-FV and Mono-SOY farms in central Iowa during 2016 only.

|                               | <b>Effect</b>         | <b>Num DF</b> | <b>Den DF</b> | <b>F Value</b> | <b>Pr &gt; F</b> |
|-------------------------------|-----------------------|---------------|---------------|----------------|------------------|
| <b>Weight (kg)</b>            | <i>Date</i>           | 1             | 10            | 6.87           | <b>0.0256</b>    |
|                               | <i>Treatment</i>      | 9             | 522           | 74.63          | <b>&lt;.0001</b> |
|                               | <i>Date*Treatment</i> | 9             | 522           | 3.19           | <b>0.0009</b>    |
|                               | <i>Woodland</i>       | 1             | 10            | 6.33           | <b>0.0306</b>    |
|                               | <i>Grassland</i>      | 1             | 10            | 0.71           | 0.4191           |
|                               | <i>Developed</i>      | 1             | 10            | 0.65           | 0.4383           |
| <b>Brood (cm<sup>2</sup>)</b> | <i>Date</i>           | 1             | 10            | 3.86           | 0.0780           |
|                               | <i>Treatment</i>      | 9             | 522           | 56.75          | <b>&lt;.0001</b> |
|                               | <i>Date*Treatment</i> | 9             | 522           | 1.30           | 0.2315           |
|                               | <i>Woodland</i>       | 1             | 10            | 2.45           | 0.1486           |
|                               | <i>Grassland</i>      | 1             | 10            | 0.56           | 0.4729           |
|                               | <i>Developed</i>      | 1             | 10            | 0.03           | 0.8710           |
| <b>Frame Sides of Bees</b>    | <i>Date</i>           | 1             | 10            | 4.74           | <b>0.0545</b>    |
|                               | <i>Treatment</i>      | 9             | 520.9         | 72.04          | <b>&lt;.0001</b> |
|                               | <i>Date*Treatment</i> | 9             | 520.9         | 1.31           | 0.2260           |
|                               | <i>Woodland</i>       | 1             | 10            | 4.28           | 0.0654           |
|                               | <i>Grassland</i>      | 1             | 10            | 1.28           | 0.2835           |
|                               | <i>Developed</i>      | 1             | 10            | 0.21           | 0.6573           |
| <b>Percent Lipid</b>          | <i>Date</i>           | 3             | 100.4         | 8.5            | <b>&lt;.0001</b> |
|                               | <i>Treatment</i>      | 1             | 12.97         | 0.02           | 0.8778           |
|                               | <i>Date*Treatment</i> | 3             | 100.4         | 1.52           | 0.2138           |
|                               | <i>Developed</i>      | 1             | 16.48         | 0.03           | 0.8589           |
|                               | <i>Grassland</i>      | 1             | 10.23         | 0.67           | 0.4314           |
|                               | <i>Woodland</i>       | 1             | 13.41         | 0.03           | 0.8691           |

**Table S13.** Simple effects comparisons of least squares means using Tukey adjustment comparing colony growth metrics and nutritional state between Div-FV and Mono-SOY farms across the season in central Iowa during 2016 only.

|                          | Date   | Farm Type | Estimate | SE      | DF      | t Value | Pr >  t | Adj P  |               |
|--------------------------|--------|-----------|----------|---------|---------|---------|---------|--------|---------------|
| Weight (kg)              | 22-May | Div-FV    | Mono-SOY | 2.7463  | 2.9255  | 17.6    | 0.94    | 0.3606 | 0.3483        |
|                          | 7-Jun  | Div-FV    | Mono-SOY | 3.6563  | 2.9255  | 17.6    | 1.25    | 0.2277 | 0.2119        |
|                          | 27-Jun | Div-FV    | Mono-SOY | 4.8676  | 2.9255  | 17.6    | 1.66    | 0.1138 | 0.0967        |
|                          | 8-Jul  | Div-FV    | Mono-SOY | 4.7299  | 2.9255  | 17.6    | 1.62    | 0.1237 | 0.1065        |
|                          | 22-Jul | Div-FV    | Mono-SOY | 6.1985  | 2.9255  | 17.6    | 2.12    | 0.0486 | <b>0.0346</b> |
|                          | 3-Aug  | Div-FV    | Mono-SOY | 10.1058 | 2.9255  | 17.6    | 3.45    | 0.0029 | <b>0.0006</b> |
|                          | 17-Aug | Div-FV    | Mono-SOY | 10.1574 | 2.9255  | 17.6    | 3.47    | 0.0028 | <b>0.0006</b> |
|                          | 31-Aug | Div-FV    | Mono-SOY | 7.8898  | 2.9255  | 17.6    | 2.70    | 0.0149 | <b>0.0072</b> |
|                          | 21-Sep | Div-FV    | Mono-SOY | 9.8681  | 2.9255  | 17.6    | 3.37    | 0.0035 | <b>0.0008</b> |
|                          | 18-Oct | Div-FV    | Mono-SOY | 6.3064  | 2.9255  | 17.6    | 2.16    | 0.0452 | <b>0.0316</b> |
| Brood (cm <sup>2</sup> ) | 22-May | Div-FV    | Mono-SOY | 216.07  | 433.33  | 31.76   | 0.50    | 0.6215 | 0.6182        |
|                          | 7-Jun  | Div-FV    | Mono-SOY | 376.28  | 433.33  | 31.76   | 0.87    | 0.3917 | 0.3856        |
|                          | 27-Jun | Div-FV    | Mono-SOY | 452.77  | 433.33  | 31.76   | 1.04    | 0.3040 | 0.2966        |
|                          | 8-Jul  | Div-FV    | Mono-SOY | 278.82  | 433.33  | 31.76   | 0.64    | 0.5246 | 0.5202        |
|                          | 22-Jul | Div-FV    | Mono-SOY | 880.33  | 433.33  | 31.76   | 2.03    | 0.0506 | <b>0.0427</b> |
|                          | 3-Aug  | Div-FV    | Mono-SOY | 1113.14 | 433.33  | 31.76   | 2.57    | 0.0151 | <b>0.0105</b> |
|                          | 17-Aug | Div-FV    | Mono-SOY | 852.13  | 433.33  | 31.76   | 1.97    | 0.0580 | <b>0.0498</b> |
|                          | 31-Aug | Div-FV    | Mono-SOY | 1097.59 | 433.33  | 31.76   | 2.53    | 0.0165 | <b>0.0116</b> |
|                          | 21-Sep | Div-FV    | Mono-SOY | 782.35  | 433.33  | 31.76   | 1.81    | 0.0805 | 0.0716        |
|                          | 18-Oct | Div-FV    | Mono-SOY | 304.59  | 433.33  | 31.76   | 0.70    | 0.4872 | 0.4824        |
| Frames Sides of Bees     | 22-May | Div-FV    | Mono-SOY | 2.0348  | 2.7594  | 23.31   | 0.74    | 0.4682 | 0.4612        |
|                          | 7-Jun  | Div-FV    | Mono-SOY | 3.0598  | 2.7594  | 23.31   | 1.11    | 0.2788 | 0.2680        |
|                          | 27-Jun | Div-FV    | Mono-SOY | 3.6973  | 2.7594  | 23.31   | 1.34    | 0.1932 | 0.1809        |
|                          | 8-Jul  | Div-FV    | Mono-SOY | 5.6984  | 2.7794  | 23.99   | 2.05    | 0.0514 | <b>0.0408</b> |
|                          | 22-Jul | Div-FV    | Mono-SOY | 4.5098  | 2.7594  | 23.31   | 1.63    | 0.1156 | 0.1028        |
|                          | 3-Aug  | Div-FV    | Mono-SOY | 7.6223  | 2.7594  | 23.31   | 2.76    | 0.0110 | <b>0.0059</b> |
|                          | 17-Aug | Div-FV    | Mono-SOY | 7.0598  | 2.7594  | 23.31   | 2.56    | 0.0175 | <b>0.0108</b> |
|                          | 31-Aug | Div-FV    | Mono-SOY | 7.1723  | 2.7594  | 23.31   | 2.60    | 0.0159 | <b>0.0096</b> |
|                          | 21-Sep | Div-FV    | Mono-SOY | 2.9848  | 2.7594  | 23.31   | 1.08    | 0.2904 | 0.2799        |
|                          | 18-Oct | Div-FV    | Mono-SOY | 4.7223  | 2.7594  | 23.31   | 1.71    | 0.1003 | 0.0876        |
| Percent Lipid            | 7-Jun  | Div-FV    | Mono-SOY | -0.0026 | 0.00314 | 82.39   | -0.84   | 0.4043 | 0.4038        |
|                          | 8-Jul  | Div-FV    | Mono-SOY | -0.0008 | 0.00314 | 82.39   | -0.24   | 0.8099 | 0.8098        |
|                          | 21-Sep | Div-FV    | Mono-SOY | 0.00053 | 0.00314 | 82.39   | 0.17    | 0.8662 | 0.8661        |
|                          | 18-Oct | Div-FV    | Mono-SOY | 0.00391 | 0.00198 | 24.28   | 1.97    | 0.0599 | <b>0.0511</b> |

**Table S14.** Simple effects comparisons of least squares means using Tukey adjustment comparing honey bee nutritional state (lipid content) across sampling dates in central Iowa during 2016.

| <b>Date</b>       | <b>Date</b>       | <b>Estimate</b> | <b>SE</b> | <b>DF</b> | <b>t Value</b> | <b>Adj P</b>     |
|-------------------|-------------------|-----------------|-----------|-----------|----------------|------------------|
| <i>7-June</i>     | <i>8-July</i>     | 0.006722        | 0.002110  | 100.4     | 3.19           | <b>0.0102</b>    |
| <i>7-June</i>     | <i>17- August</i> | 0.007235        | 0.002110  | 100.4     | 3.43           | <b>0.0048</b>    |
| <i>7-June</i>     | <i>18 October</i> | 0.008668        | 0.001723  | 100.4     | 5.03           | <b>&lt;.0001</b> |
| <i>8-July</i>     | <i>17- August</i> | 0.000513        | 0.002110  | 100.4     | 0.24           | 0.9949           |
| <i>8-July</i>     | <i>18 October</i> | 0.001945        | 0.001723  | 100.4     | 1.13           | 0.6724           |
| <i>17- August</i> | <i>18 October</i> | 0.001432        | 0.001723  | 100.4     | 0.83           | 0.8394           |
